# Supplementary material
Source: HighWire-hosted journal article supplement (https://bmjopen.bmj.com/content/11/11/e049807)
Supplement: inline-supplementary-material-1 [file inline-supplementary-material-1.pdf]

Supplementary Table 1. Maternal characteristics according to different foetal APOs

| Characteristics                          | Foetal loss |         | P value | Premature birth |         | P value | SGA     |         |         | Asphyxia neonatorum |         | P value |
|------------------------------------------|-------------|---------|---------|-----------------|---------|---------|---------|---------|---------|---------------------|---------|---------|
|                                          | Yes         | No      |         | Yes             | No      |         | Yes     | No      | P value | Yes                 | No      |         |
|                                          | (n=70)      | (n=443) |         | (n=128)         | (n=316) |         | (n=120) | (n=324) |         | (n=11)              | (n=433) |         |
| Primipara                                | 30          | 208     | 0.6     | 55              | 153     | 0.5     | 54      | 154     | 0.72    | 5                   | 203     | 0.86    |
| Multiple pregnancy                       | 7           | 1       | 0.93    | 4               | 3       | 0.24    | 5       | 2       | 0.02*   | 0                   | 7       | 0.91    |
| Diabetes                                 | 0           | 2       | 0.57    | 1               | 1       | 0.66    | 0       | 2       | 0.43    | 0                   | 2       | 0.8     |
| Pre-pregnancy hypertension               | 12          | 9       | <0.01*  | 8               | 4       | <0.01*  | 7       | 5       | 0.29    | 2                   | 10      | <0.01*  |
| Remission < 6 months prior to conception | 8           | 10      | <0.01*  | 8               | 2       | <0.01*  | 8       | 2       | <0.01*  | 1                   | 9       | <0.01*  |
| Duration of SLE                          |             |         |         |                 |         |         |         |         |         |                     |         |         |
| ≤5 years                                 | 45          | 228     | 0.15    | 67              | 162     | 0.43    | 55      | 174     | 0.04*   | 6                   | 223     | 0.42    |
| 6–10 years                               | 16          | 146     |         | 42              | 104     |         | 49      | 97      |         | 3                   | 143     |         |
| >10 years                                | 9           | 69      |         | 19              | 50      |         | 16      | 53      |         | 2                   | 67      |         |
| APS                                      | 10          | 31      | 0.04*   | 29              | 12      | 0.51    | 31      | 10      | 0.86    | 41                  | 0       | 0.40    |
| Lupus characteristics                    |             |         |         |                 |         |         |         |         |         |                     |         |         |
| Renal disorders                          | 22          | 67      | <0.01*  | 26              | 41      | <0.01*  | 28      | 39      | 0.04*   | 3                   | 64      | <0.01*  |
| Mucocutaneous                            | 22          | 129     | 0.63    | 33              | 96      | 0.56    | 31      | 98      | 0.32    | 2                   | 127     | 0.64    |
| Neurological disorders                   | 3           | 4       | 0.06    | 1               | 3       | 0.07    | 3       | 1       | 0.2     | 0                   | 4       | 0.07    |
| Leukopaenia                              | 9           | 39      | 0.27    | 13              | 26      | 0.43    | 9       | 30      | 0.42    | 1                   | 38      | 0.52    |
| Thrombocytopaenia                        | 8           | 34      | 0.28    | 17              | 17      | 0.02*   | 15      | 19      | 0.04*   | 2                   | 32      | 0.23    |
| Arthritis                                | 14          | 102     | 0.62    | 30              | 72      | 0.87    | 22      | 80      | 0.2     | 3                   | 99      | 0.83    |
| Serositis                                | 13          | 13      | <0.01*  | 7               | 6       | 0.03*   | 6       | 7       | 0.96    | 0                   | 13      | <0.01*  |

PIH = pregnancy-induced hypertension; SGA = small for gestational age; \* P < 0.05

(Continued) Supplementary Table 1. Maternal characteristics according to different foetal APOs

| Characteristics                 | Foetal loss   |               | P value | Premature birth |               | P value | SGA            |               | P value | Asphyxia neonatorum |               | P value |
|---------------------------------|---------------|---------------|---------|-----------------|---------------|---------|----------------|---------------|---------|---------------------|---------------|---------|
|                                 | Yes<br>(n=70) | No<br>(n=443) |         | Yes<br>(n=128)  | No<br>(n=316) |         | Yes<br>(n=120) | No<br>(n=324) |         | Yes<br>(n=11)       | No<br>(n=433) |         |
| PIH                             | 49            | 96            | <0.01*  | 53              | 43            | <0.01*  | 48             | 48            | <0.01*  | 4                   | 92            | <0.01*  |
| Disease flares during pregnancy | 24            | 66            | <0.01*  | 34              | 32            | <0.01*  | 36             | 30            | <0.01*  | 4                   | 62            | <0.01*  |
| Laboratory parameters           |               |               |         |                 |               |         |                |               |         |                     |               |         |
| <i>Anti-dsDNA</i>               | 62            | 338           | 0.02*   | 93              | 246           | 0.05    | 88             | 251           | 0.16    | 8                   | 331           | 0.07    |
| <i>Hypocomplementemia-C3</i>    | 48            | 108           | <0.01*  | 38              | 71            | 0.02*   | 39             | 70            | 0.56    | 3                   | 106           | 0.26    |
| <i>Hypocomplementaemia-C4</i>   | 26            | 57            | <0.01*  | 18              | 39            | 0.11    | 19             | 38            | 0.9     | 1                   | 56            | 0.36    |
| <i>SSA/Ro</i>                   | 40            | 236           | 0.45    | 70              | 166           | 0.69    | 66             | 170           | 0.76    | 2                   | 234           | 0.04*   |
| <i>SSB/La</i>                   | 12            | 58            | 0.33    | 20              | 38            | 0.37    | 20             | 38            | 0.27    | 0                   | 58            | 0.27    |
| <i>Sm</i>                       | 11            | 24            | <0.01*  | 8               | 16            | 0.16    | 7              | 17            | 0.62    | 0                   | 24            | 0.54    |
| <i>UIRNP</i>                    | 24            | 99            | 0.02*   | 33              | 66            | 0.05    | 34             | 65            | 0.2     | 1                   | 98            | 0.2     |
| <i>Nucleosome</i>               | 29            | 102           | <0.01*  | 35              | 67            | 0.04*   | 31             | 71            | 0.93    | 2                   | 100           | 0.28    |
| <i>aCL-IgG</i>                  | 12            | 28            | <0.01*  | 10              | 18            | 0.12    | 10             | 18            | 0.8     | 0                   | 28            | 0.48    |
| <i>aCL-IgM</i>                  | 9             | 13            | <0.01*  | 7               | 6             | 0.03*   | 4              | 9             | 0.55    | 0                   | 13            | 0.72    |
| <i>β2GPI-IgG</i>                | 8             | 14            | <0.01*  | 5               | 9             | 0.19    | 9              | 5             | 0.26    | 0                   | 14            | 0.7     |
| <i>β2GPI-IgM</i>                | 9             | 34            | 0.13    | 10              | 24            | 0.14    | 8              | 26            | 0.43    | 0                   | 34            | 0.41    |
| Medication                      |               |               |         |                 |               |         |                |               |         |                     |               |         |
| <i>Glucocorticoid</i>           | 70            | 431           | 0.38    | 126             | 306           | 0.23    | 118            | 314           | 0.74    | 10                  | 422           | 0.14    |
| <i>Hydroxychloroquine</i>       | 41            | 364           | <0.01*  | 108             | 257           | 0.08    | 99             | 266           | 0.27    | 9                   | 356           | 0.29    |
| <i>Immunosuppressive agent</i>  | 10            | 35            | 0.07    | 18              | 17            | <0.01*  | 17             | 18            | <0.01*  | 2                   | 33            | 0.09    |
| <i>Aspirin</i>                  | 23            | 375           | <0.01*  | 100             | 275           | <0.01*  | 93             | 282           | <0.01*  | 7                   | 368           | <0.01*  |
| <i>LMWH</i>                     | 10            | 128           | <0.01*  | 39              | 89            | 0.08    | 35             | 93            | 0.09    | 0                   | 128           | 0.02*   |

PIH = pregnancy-induced hypertension; SGA = small for gestational age; LMWH = low-molecular-weight heparin; \*: P < 0.05

**Supplementary Table 2. Multivariable analysis of HDP**

| Characteristics            | B     | P value | OR   | 95% CIs    |
|----------------------------|-------|---------|------|------------|
| Pre-pregnancy hypertension | 2.200 | <0.01   | 9.03 | 3.17–25.64 |
| Renal disorders            | 0.997 | <0.01   | 2.71 | 1.47–4.97  |
| Thrombocytopaenia          | 1.175 | <0.01   | 3.24 | 1.49–6.99  |

HDP = hypertensive disorders of pregnancy

**Supplementary Table 3. The APOs associated with different intervals of complement-C3**

| Complement-C3 (g/L) | Total (N=513) | Composite foetal APOs (%) | Foetal loss (%) | HDP (%)   |
|---------------------|---------------|---------------------------|-----------------|-----------|
| ≥0.9                | 357           | 140 (39.2)                | 22 (6.1)        | 48 (13.4) |
| <0.9                | 156           | 96 (61.5)                 | 48 (30.7)       | 42 (26.9) |
| <0.8                | 112           | 74 (66.0)                 | 42 (37.5)       | 33 (29.4) |
| <0.7                | 72            | 55 (76.3)                 | 36 (50.0)       | 25 (34.7) |
| <0.6                | 41            | 34 (82.9)                 | 25 (60.9)       | 17 (41.4) |
| <0.5                | 27            | 25 (92.5)                 | 19 (70.3)       | 11 (40.7) |
| <0.4                | 14            | 13 (92.8)                 | 11 (78.5)       | 5 (35.7)  |
| <0.3                | 8             | 7 (87.5)                  | 6 (75.0)        | 3 (37.5)  |

**Supplementary Table 4. The APOs associated with different intervals of complement-C4**

| Complement-C4 (g/L) | Total (N=513) | Composite foetal APOs (%) | Foetal loss (%) | HDP (%)   |
|---------------------|---------------|---------------------------|-----------------|-----------|
| ≥0.1                | 430           | 188 (43.7)                | 44 (10.2)       | 66 (15.3) |
| <0.1                | 83            | 48 (57.8)                 | 26 (31.3)       | 24 (28.9) |
| <0.09               | 65            | 39 (60.0)                 | 23 (35.3)       | 21 (32.3) |
| <0.08               | 50            | 33 (66.0)                 | 21 (42.0)       | 18 (36.0) |
| <0.07               | 37            | 25 (67.5)                 | 17 (45.9)       | 14 (37.8) |
| <0.06               | 22            | 14 (63.6)                 | 10 (45.4)       | 9 (40.9)  |
| <0.05               | 12            | 9 (75.0)                  | 7 (58.2)        | 6 (50.0)  |
| <0.04               | 7             | 6 (85.7)                  | 5 (71.4)        | 4 (57.1)  |
| <0.03               | 5             | 5 (100.0)                 | 5 (100.0)       | 2 (40.0)  |
